# Supplementary material for: Oral Health Perceptions Among Elite Athletes and Elite Para-Athletes: Psychosocial Impacts, Sports Performance
Source: Research Square preprint supplement (doi:10.21203/rs.3.rs-7308874/v1), 2025-09-01
Supplement: Supplementary file 1 [file 0b3db5ea1c2e9eb2fc10de3a.docx]

Supplementary Table 1 Association between elite para-athletes and athletes and their education level

| Variable | *n* | Education Level | | | χ2 statistica (df) | *p*-valuea |
| --- | --- | --- | --- | --- | --- | --- |
| **None/ Primary** | **Secondary** | **Tertiary** |
|  |  | **n (%)** | **n (%)** | **n (%)** |
| Elite Athletes |  |  |  |  | 10.28 (2) | 0.006 |
| Para-athletes | 57 | 6 (10.5) | 44 (77.2) | 7 (12.3) |  |  |
| Athletes | 57 | 2 (3.5) | 34 (59.7) | 21 (36.8) |  |  |

*Note:* aChi-square test for independence n= frequency df= Degree of Freedom

Supplementary Table 2 Self-Reported Psychosocial Impacts of Oral Health

|  | | Elite Para-Athletes (n=57) | Elite Athletes (n=57) |
| --- | --- | --- | --- |
|  | | n(%) | n(%) |
| Psychosocial Impacts | |  |  |
| 1 | **Difficulty eating or drinking over the past 12 months** |  |  |
|  | Not at all | 34 (59.7) | 23 (40.4) |
|  | A little | 15 (26.3) | 23 (40.4) |
|  | Somewhat | 8 (14.0) | 10 (17.5) |
|  | A fair amount | 0 (0) | 0 (0) |
|  | A great deal | 0 (0) | 1 (1.8) |
| 2 | **Difficulty relaxing over the past 12 months** |  |  |
|  | Not at all | 41 (71.9) | 34 (59.6) |
|  | A little | 11 (19.3) | 16 (28.1) |
|  | Somewhat | 4 (7.0) | 7 (12.3) |
|  | A fair amount | 0 (0) | 0 (0) |
|  | A great deal | 1 (1.8) | 0 (0) |
| 3 | **Difficulty smiling, laughing, showing teeth without embarrassment over the past 12 months** |  |  |
|  | Not at all | 42 (73.7) | 39 (68.4) |
|  | A little | 9 (15.8) | 13 (22.8) |
|  | Somewhat | 4 (7.0) | 2 (3.5) |
|  | A fair amount | 1 (1.8) | 2 (3.5) |
|  | A great deal | 1 (1.8) | 1 (1. 8) |

Supplementary Table 3 Self-Reported Sports Performance Impacts of Oral Health

|  | | Elite Para-Athletes (n=57) | Elite Athletes (n=57) |
| --- | --- | --- | --- |
|  | | n(%) | n(%) |
| Impacts on Sports Performance | |  |  |
| 1 | **Difficulty participating in normal training or competition due to problems with mouth, teeth or gums over the past 12 months** |  |  |
|  | Full participation without mouth, teeth or gum problems | 48 (84.2) | 38 (66.7) |
|  | Full participation but with mouth, teeth or gum problems | 6 (10.5) | 10 (17.5) |
|  | Reduced participation due to mouth, teeth or gum problems | 2 (3.5) | 4 (7.0) |
|  | Could not participate due to mouth, teeth or gum problems | 1 (1. 8) | 5 (8.8) |
|  |  |  |  |
| 2 | **Extent of reduction of training volume due to mouth, teeth or gum problems over the past 12 months** |  |  |
|  | No reduction | 48 (84.2) | 38 (66. 7) |
|  | Minor reduction | 8 (14.0) | 10 (17.5) |
|  | Moderate reduction | 0 (0) | 5 (8.8) |
|  | To a major extent | 0 (0) | 1 (1. 8) |
|  | Could not participate at all | 1 (1. 8) | 3 (5.3) |
|  |  |  |  |
| 3 | **Extent of performance affected due to problems with mouth, teeth or gums over the past 12 months** |  |  |
|  | No effect | 47 (82.5) | 41 (71.9) |
|  | To a minor extent | 9 (15.8) | 9 (15.8) |
|  | To a moderate extent | 1 (1. 8) | 5 (8.8) |
|  | To a major extent | 0 (0) | 2 (3.5) |
|  | Could not participate at all | 0 (0) | 0 (0) |
|  |  |  |  |
| 4 | **Extent of pain experience from mouth, teeth or gums over the past 12 months** |  |  |
|  | No pain | 31 (54.4) | 31 (54.4) |
|  | Mild pain | 19 (33.33) | 14 (24.6) |
|  | Moderate pain | 5 (8.8) | 11 (19.3) |
|  | Severe pain | 2 (3.5) | 1 (1. 8) |

Supplementary Table 4 Association between elite para-athletes and athletes and their perceived health status

| Variable | *n* | Health Status  Very Good/ Good n (%) | Health Status  Fair/Poor  N (%) | χ2 statistica (df) | *p*-valuea |
| --- | --- | --- | --- | --- | --- |
| Elite Athletes |  |  |  | 0.46 (1) | 0.497 |
| Para-athletes | 57 | 46 (80.7) | 11 (19.3) |  |  |
| Athletes | 57 | 43 (75.4) | 14 (24.6) |  |  |

*Note:* aChi-square test for independence n= frequency df= Degree of Freedom

Supplementary Table 5 Association between elite para-athletes and athletes and their perceived oral health status

| Variable | *n* | Oral Health Status  Very Good/ Good n (%) | Oral Health Status  Fair/Poor  N (%) | χ2 statistica (df) | *p*-valuea |
| --- | --- | --- | --- | --- | --- |
| Elite Athletes |  |  |  | 0.97 (1) | 0.324 |
| Para-Athletes | 57 | 40 (70.2) | 17 (29.8) |  |  |
| Athletes | 57 | 35 (61.4) | 22 (38.6) |  |  |

*Note:* aChi-square test for independence n= frequency df= Degree of Freedom

Supplementary Table 6 Comparing median total oral health related psychosocial impact score between elite athletes and para-athletes

| Variable | *n* | Total psychosocial  Impact Score Median (IQR) | Z statistic | *p*-valuea |
| --- | --- | --- | --- | --- |
| Elite Athletes |  |  | -1.365 | 0.172 |
| Para-Athletes | 57 | 8.33 (20.83) |  |  |
| Athletes | 57 | 8.33 (25.00) |  |  |

*Note:* aMann-Whitney test IQR= Interquartile Range

Supplementary Table 7 Comparison of oral health status and its impact among elite athletes across studies

| **Reference** | **Study population** | **N** | **Health Fair/ Poor** | **Oral Health Fair/ Poor** | **Performance Impact** | **Psychosocial Impact** |
| --- | --- | --- | --- | --- | --- | --- |
| ***Current Study*** | ***Malaysian Para-athletes*** | ***57*** | ***19.3%*** | ***29.8%*** | ***50.9%*** | ***52.6%*** |
| ***Malaysian elite athletes (matched)*** | ***57*** | ***24.6%*** | ***38.6%*** | ***57.9%*** | ***66.7%*** |
| Mohammad-Hassan et al., 2021 [10](#_ENREF_10) | Malaysian elite athletes | 249 | 23.2% | - | 32.5% | - |
| Kragt et al., 2019 [32](#_ENREF_32) | Dutch elite athletes (Olympics & Paralympics) | 116 | - | 71.8% | 10.0% | 27.3% |
| Gallagher et al., 2018 [14](#_ENREF_14) | UK Elite athletes | 344 | 9.9% | 30.8% | 32.0% | 49.1% |
| Needleman et al., 2015 [11](#_ENREF_11) | UK Professional male football players | 187 | - | 45.5% | 6.9% | 19.6% |
| Needleman et al., 2013 [7](#_ENREF_7) | Elite athletes  London 2012 Olympics | 278 | - | 40.0% | 18.0% | 28.0% |
